# Supplementary material for: Complete Genome Sequence and Analysis of a ST573 Multidrug-Resistant Methicillin-Resistant Staphylococcus aureus SauR3 Clinical Isolate from Terengganu, Malaysia
Source: MDPI journal article supplement (doi:10.3390/pathogens12030502), 2023-03-22
Supplement: s1 [file s1]

## Supplementary materials:

### **Complete Genome Sequence and Analysis of a ST573 Multidrug-Resistant Methicillin-Resistant *Staphylococcus aureus* SauR3 Clinical Isolate from Terengganu, Malaysia**

Esra'a I. Al-Trad<sup>1</sup>, Ainal Mardziah Che Hamzah<sup>2</sup>, Suat Moi Puah<sup>3</sup>, Kek Heng Chua<sup>3</sup>, Muhamad Zarul Hanifah<sup>4</sup>, Qasim Ayub<sup>4</sup>, Prasit Palittapongarnpim<sup>5</sup>, Stephen M. Kwong<sup>6</sup>, Ching Hoong Chew<sup>2\*</sup>, and Chew Chieng Yeo<sup>1\*</sup>

\* Author for correspondence: [chewch@unisza.edu.my](mailto:chewch@unisza.edu.my) (C.H.C.); [chewchieng@gmail.com](mailto:chewchieng@gmail.com) (C.C.Y.)

**Please refer Excel for supplementary tables,**

**Table S1:** List of genes encoding virulence factors detected in SauR3 genome.

**Table S2:** List of *Staphylococcus aureus* strains used to construct the phylogenetic tree depicted in Figure 1.
